# Supplementary material
Source: PubMed Central journal article supplement (PMC7914287)
Supplement: NIHMS1630736-supplement-Supp_Fig_1.pdf [file NIHMS1630736-supplement-Supp_Fig_1.pdf]

### Physical Function – Short Form 4a

Please respond to each question or statement by marking one box per row.

|       |                                                                | Without<br>any<br>difficulty  | With a<br>little<br>difficulty | With<br>some<br>difficulty    | With<br>much<br>difficulty    | Unable to<br>do               |
|-------|----------------------------------------------------------------|-------------------------------|--------------------------------|-------------------------------|-------------------------------|-------------------------------|
| PFA11 | Are you able to do chores such as vacuuming or yard work?..... | <input type="checkbox"/><br>5 | <input type="checkbox"/><br>4  | <input type="checkbox"/><br>3 | <input type="checkbox"/><br>2 | <input type="checkbox"/><br>1 |
| PFA21 | Are you able to go up and down stairs at a normal pace? .....  | <input type="checkbox"/><br>5 | <input type="checkbox"/><br>4  | <input type="checkbox"/><br>3 | <input type="checkbox"/><br>2 | <input type="checkbox"/><br>1 |
| PFA23 | Are you able to go for a walk of at least 15 minutes? .....    | <input type="checkbox"/><br>5 | <input type="checkbox"/><br>4  | <input type="checkbox"/><br>3 | <input type="checkbox"/><br>2 | <input type="checkbox"/><br>1 |
| PFA53 | Are you able to run errands and shop?.....                     | <input type="checkbox"/><br>5 | <input type="checkbox"/><br>4  | <input type="checkbox"/><br>3 | <input type="checkbox"/><br>2 | <input type="checkbox"/><br>1 |
